# Supplementary material for: Re-routing photosynthetic energy for continuous hydrogen production in vivo
Source: PubMed Central journal article supplement (PMC6844042; doi:10.1186/s13068-019-1608-3), 2019-11-11
Supplement: 13068_2019_1608_MOESM1_ESM.pdf [file 13068_2019_1608_MOESM1_ESM.pdf]

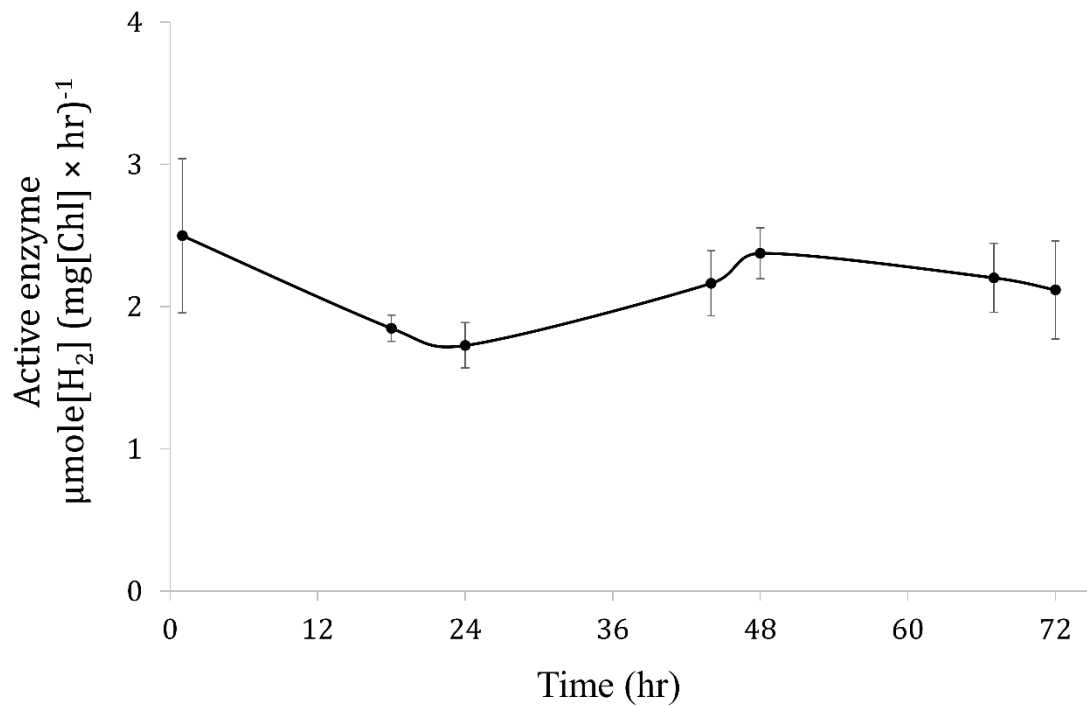

**Figure S1 – Active protein abundance during Long-term H<sub>2</sub> photoproduction.**

Cultures of HS-14 (n=4) were placed in BlueSens 1 L-photobioreactor measuring system. Following 2hr dark induction, the bioreactors were continuously illuminated at  $180 \mu\text{mol photons}\cdot\text{m}^{-2}\cdot\text{s}^{-1}$ . For hydrogenase activity measurement, 2mL samples were drawn and a modified MV assay was used, in which the samples were directly added to the activity buffer without dark incubation (*see method*). Error bars represent standard error.

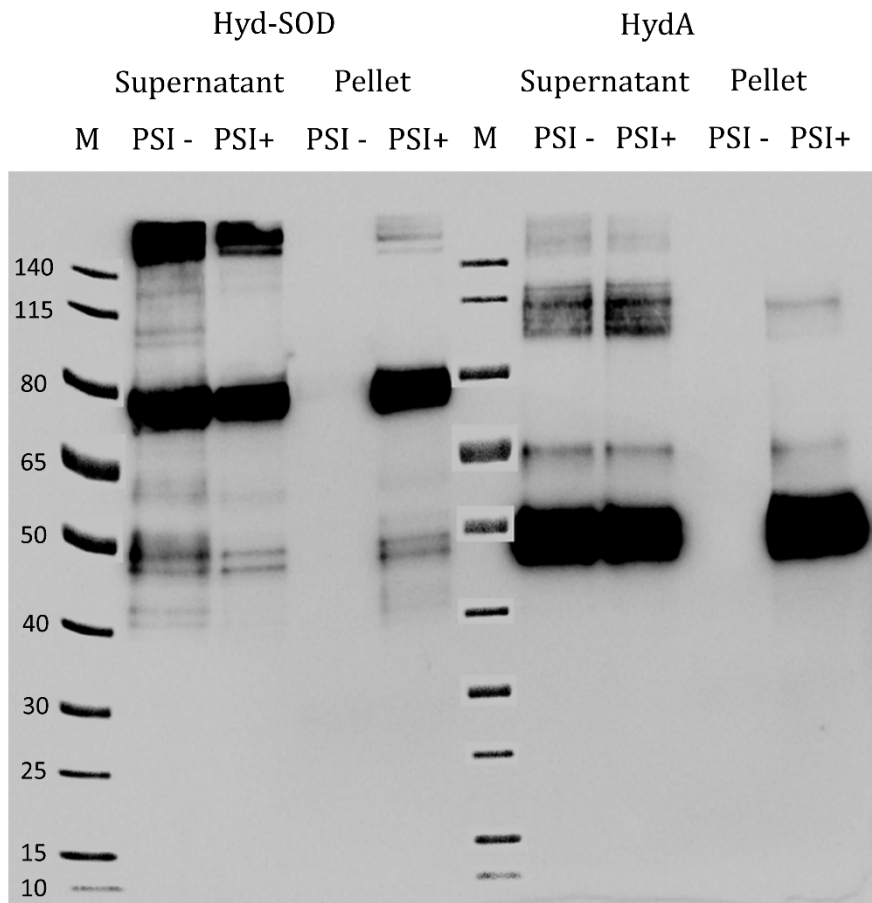

**Figure S2 - Hyd-SOD Pull down assay.**

Recombinant HydA and Hyd-SOD were expressed and purified as described previously (Ref). Histaged PSI was purified according to (Ref). For pull down assay, purified Histaged PSI was incubated with nickel beads, followed by 3 washing steps. Then the protein of choice was incubated with the PSI coated beads for 15 min, followed by 3 additional washing steps. The supernatant and beads containing pellet were analyze by immunoblot assay (*see method*). PSI- represent non coated beads and PSI+ represent PSI coated beads.
